1           **Prevalence and associated factors of suicidal behavior**  
2                           **among adolescents in rural Bangladesh**

3  
4 Rifa Tamanna Mumu<sup>1</sup>, Md Parvez Shaikh<sup>2</sup> Dipak Kumar Mitra<sup>1</sup>

5 <sup>1</sup>Department of Public Health, School of Health and Life Science, North South  
6 University, Bashundhara, Dhaka, Bangladesh

7 <sup>1</sup>Poddar para, Lohagara Pouroshova, Lohagara, Lohagara-7511, Narail, Bangladesh

8 <sup>2</sup>Industrial and Production Engineering, Shahjalal University of Science and Technology,  
9 Sylhet, Bangladesh

10 **\*Corresponding author:**

11 Rifa Tamanna Mumu<sup>1</sup>

12 Poddar para, Lohagara Pouroshova, Lohagara-7511,

13 Narail, Bangladesh.

14 Email: [rifa.tamanna.sbmc@gmail.com](mailto:rifa.tamanna.sbmc@gmail.com) (R.T.Mumu)

15 **Author contribution**

16 Investigation, Methodology, Data curation, Formal analysis, Writing (Original draft  
17 preparation: Rifa Tamanna Mumu<sup>1</sup>

18 Writing (Original draft preparation, and Editing), Resources: Md Parvez Shaikh<sup>2</sup>

19 Conceptualization, Supervision, Review: Dipak Kumar Mitra<sup>1</sup>

20 **Keywords**

21 Suicidal behavior, Adolescents, Rural Bangladesh, Adolescent mental health, Suicide,

22 Mental health

## 23 Abstract

24 **Background:** Among the four leading causes of worldwide death, suicide is one, which is  
25 prevailing especially in lower-middle-income countries. However, the number of studies is  
26 minimal based on adolescent suicidal behavior in rural Bangladesh. This study aims to  
27 identify the prevalence and associated factors of suicidal behavior in adolescents in a remote  
28 subdistrict in Bangladesh.

29 **Method:** A cross-sectional study was performed in Lohagara, a rural subdistrict in southern  
30 Bangladesh from July, 15 to August 14, 2024. 350 subjects were recruited for the study, all of  
31 whom were school-going adolescents aged 11 to 17. The Bengali-translated versions of the  
32 Suicidal Behavior-Revised Questionnaire (SBQ-R) and the Depression, Anxiety, and Stress  
33 Scale - 21 Items (DASS-21), as well as another structured questionnaire, were used to obtain  
34 data from participants. Data were analyzed by STATA version 17.

35 **Result:** The prevalence of suicidal behavior among adolescents is 12.3% (95% CI: 9.2% to  
36 16.2%) (overall SBQ-R score of 7 or more). Having step-parents, peer conflict, stress,  
37 anxiety, and a family history of suicide are found to be significantly associated with the  
38 development of suicidal behavior in adolescents. Unmarried and single relationship status and  
39 the overprotective attitude of parents play a protective role in growing young adults' suicidal  
40 tendencies.

41 **Conclusion:** The notable prevalence of suicidal behavior in adolescents underscores the need  
42 for screening and intervention at an early age. Different health promotional and educational  
43 programs can be organized in schools and communities. The ultimate goal is to protect  
44 adolescents with adequate counseling, care, and support.

45

46

## 47 **1. Introduction**

48 Approximately, 703 individuals are committing suicide all over the world per year, according  
49 to the World Health Organization. Notably, 90% of the world's adolescents reside in lower-  
50 middle-income countries like Bangladesh, where the rate of adolescent suicide is 88%.

51 Suicide

52 ranks as the fourth predominant cause of death among the populace aged 15 to 29 years. A  
53 9.5% global suicide rate can be observed in males and 4.18% in females among individuals  
54 of 15 to 19 years in the year 2009, as well as a greater susceptibility is noticed in elderly  
55 adolescents, particularly males (2).

56 A study carried out with preadults of 12 to 17 years residing in 82 lower-middle-income  
57 countries unveiled a 14% rate of suicidal ideation. The percentage was greater in African  
58 countries (21%) than in Asia (8%). Factors including female gender, comparatively older age,  
59 low socio-economic status, inadequacy of close friendships, overprotective parenting style,  
60 peer conflicts, isolation, and victimization, were substantially associated with suicidal  
61 ideation and anxiety among young adults (3). In Brazil, a similar trend was discovered, where  
62 11 to 15-year-old preadults manifested a 14.1% prevalence of suicidal ideation, and  
63 conducive factors included female gender, conduct disorders, substance abuse, and  
64 depressive symptoms (4).

65 From the perspective of Bangladesh, city dwellers reveal a comparatively declining suicide  
66 rate than countryside people. Preadults, the elderly, and rural residents are more prone to  
67 suicide, and a 20.1% suicide rate is observed among rural Bangladeshi adolescents (5). In a  
68 study conducted with 14 to 19-year-old country adolescents in Bangladesh in 2013, a 5%

69 lifetime suicidal ideation was detected (6). The prevalence of suicidal ideation among  
70 university students was 13.8% and influencing factors were gender, year of education,  
71 socioeconomic condition, family suicidal history, depression, and observance of traumatic  
72 incidents (7). The evaluated percentage of suicidal ideation among 18 to 28-year-olds was  
73 12.8% during the early-COVID-19 period, where the associated factors encompassed prior  
74 suicidal attempts, family history, sleep issues, stress, anxiety, and depression (8).

75 school-going young adults aged 11 to 18 years revealed an 11.7% prevalence of suicidal  
76 behavior in the research performed with the Global School-based Health Survey data in  
77 Bangladesh (2014). Associated factors included bullying, loneliness, an insufficiency of close  
78 friendships, substance abuse, anxiety, experiencing negligence in parental homework  
79 checking, participating in sexual activity, and insufficient peer support (9). Although several  
80 studies in Bangladesh were conducted to evaluate suicidal ideation in preadults, the  
81 concentration was on university students to the greatest extent, which left a gap in  
82 recognizing the status among school-going country adolescents. Hence, this study focuses on  
83 evaluating the prevalence and influencing factors of suicidal behavior in 11 to 17-year-  
84 school-going adolescents in a rural sub-district in Bangladesh. The notion of the current  
85 prevalence and associated factors will help stakeholders and policymakers make proper  
86 decisions and appropriate actions to build consciousness to safeguard preadults' mental well-  
87 being and protect them from making extreme decisions.

88

## 89 **2. Method**

### 90 **2.1 Study Design and Participants**

91 A cross-sectional study was conducted between July 15 and August 14, 2024, among 11 to  
92 17-year-old adolescents studying in Lohagara Government Pilot High School, a rural high  
93 school in Bangladesh. Considering the prevalence of suicidal ideation among adolescents in  
94 Bangladesh at 11.7% (9), in 95% confidence interval, and a 4% degree of precision, 350  
95 participants were selected using a stratified sampling technique.

96

## 97 **2.2 Data Collection Tools**

98 The persistence of suicidal behavior was determined by the Suicidal Behavior-Revised  
99 Questionnaire (SBQ-R). A cut-off score of 7 or higher indicated positive screening for having  
100 suicidal behavior. The Depression, Anxiety, and Stress Scale-21 Items (DASS-21) was used  
101 to assess psychological factors like the level of anxiety, depression, and stress. Another  
102 structured questionnaire was used to collect data on participants' sociodemographic,  
103 behavioral, socio-environmental, institutional, and family-environmental factors. All  
104 questionnaires were translated into Bengali for effective communication.

105

## 106 **2.3 Data Management & Analysis**

107 The data for the study was analyzed by STATA version 17. An Independent sample t-test was  
108 performed to compare the mean between the two groups and Pearson's chi-square test was  
109 applied to find out the possible association between variables. To adjust the confounding  
110 factors, a multivariate analysis using multinomial logistic regression was conducted. Adjusted  
111 and unadjusted odds ratios and their 95% CI were used as indicators strength of the  
112 association.

113

## 114 2.4 Ethical Considerations

115 Ethical permission was taken from the Institutional Ethics Committee of North South  
116 University before data collection (2024/OR-NSU/IRB/0201). A permission letter was  
117 obtained from the school authorities. Informed written consent was taken from the legal  
118 guardians of students before data collection. The respondents were assured of the  
119 confidentiality of information.

120

## 121 3. Result

### 122 3.1 Prevalence of suicidal behavior among adolescents

123 The Suicidal Behavior-Revised Questionnaire (SBQ-R) was used to evaluate the prevalence  
124 of suicidal behavior. An overall cut-off score of 7 or more was used to determine suicidal  
125 behavior among adolescents. The mean SBQ-R score was 4.7 (95% CI: 4.3-5). 12.3% (95%  
126 CI: 9.2% to 16.2%) (42) of students were found to have suicidal behavior after analysis. **Table**  
127 *I*.

128 **Table 1.Characteristics of 11 to 17-year-old adolescents in Lohagara (a rural sub-**  
129 **district in Bangladesh), 2024.**

| Variables               | Category    | Number<br>(n) | Percentage<br>(%) |
|-------------------------|-------------|---------------|-------------------|
| <b>Sociodemographic</b> |             |               |                   |
| Age                     | 11-13 years | 115           | 33.7              |
|                         | 13-17 years | 226           | 66.3              |
| Gender                  | Male        | 164           | 48.4              |

|                                            |                      |     |      |
|--------------------------------------------|----------------------|-----|------|
|                                            | Female               | 175 | 51.6 |
| Occupational involvement besides the study | Involved             | 13  | 4.1  |
|                                            | Not involved         | 302 | 95.9 |
| Religion                                   | Hindu                | 50  | 14.7 |
|                                            | Muslim               | 290 | 85.3 |
|                                            | Others               | 0   | 0    |
| Number of family members                   | 4 or less            | 173 | 50.7 |
|                                            | More than 4          | 168 | 49.3 |
| Socioeconomic status                       | Low                  | 94  | 27.5 |
|                                            | Medium               | 166 | 48.7 |
|                                            | High                 | 81  | 23.8 |
| House ownership of parents                 | Yes                  | 292 | 87.6 |
|                                            | No                   | 41  | 12.3 |
| Monthly family income (BDT)                | >20,000              | 166 | 49.9 |
|                                            | 10,000-20,000        | 102 | 30.6 |
|                                            | <10,000              | 65  | 19.5 |
| Living with parents                        | Both                 | 266 | 78.7 |
|                                            | Single parent        | 59  | 17.5 |
|                                            | Without parents      | 13  | 3.9  |
| Relationship status                        | Unmarried and single | 309 | 92.2 |
|                                            | In a relationship    | 15  | 4.5  |
|                                            | Complex              | 9   | 2.7  |
|                                            | Married              | 2   | 0.6  |
| Step-parents                               | Have                 | 27  | 8    |
|                                            | Do not have          | 311 | 92   |
| <b>Behavioral</b>                          |                      |     |      |
| Smoking                                    | Yes                  | 7   | 2.1  |
|                                            | No                   | 331 | 97.9 |
| Internet use                               | <3 hours             | 321 | 95.3 |
|                                            | 3-16 hours           | 12  | 3.5  |
|                                            | >16 hours            | 4   | 1.2  |
| Extracurricular activities                 | Involved             | 165 | 49.3 |
|                                            | Not involved         | 170 | 50.7 |

| <b>Institutional</b>                 |                       |                 |          |          |
|--------------------------------------|-----------------------|-----------------|----------|----------|
| Close friends                        | Have                  |                 | 297      | 87.6     |
|                                      | Don't have            |                 | 42       | 12.4     |
| Educational stress                   | No stress             |                 | 38       | 11.2     |
|                                      | Moderate              |                 | 259      | 76.2     |
|                                      | Severe                |                 | 43       | 12.6     |
| Peer conflict                        | No                    |                 | 242      | 71.6     |
|                                      | Moderate              |                 | 88       | 26       |
|                                      | Severe                |                 | 8        | 2.4      |
| Grades                               | Satisfactory          |                 | 214      | 62.9     |
|                                      | Unsatisfactory        |                 | 126      | 37.6     |
| Teacher support                      | Good                  |                 | 312      | 92.3     |
|                                      | Moderate              |                 | 21       | 6.2      |
|                                      | Poor                  |                 | 5        | 1.5      |
| <b>Family-environmental</b>          |                       |                 |          |          |
| Relationship with parents            | Good                  |                 | 263      | 77.4     |
|                                      | Moderate              |                 | 71       | 20.9     |
|                                      | Poor                  |                 | 6        | 1.7      |
| Relationships between family members | Good                  |                 | 257      | 75.6     |
|                                      | Moderate              |                 | 79       | 23.2     |
|                                      | Poor                  |                 | 4        | 1.2      |
| Overprotective parents               | Yes                   |                 | 279      | 81.8     |
|                                      | Moderately protective |                 | 57       | 16.7     |
|                                      | No                    |                 | 5        | 1.5      |
| Domestic violence                    | Not at all            |                 | 219      | 64.2     |
|                                      | Moderate              |                 | 112      | 32.8     |
|                                      | Severe                |                 | 10       | 2.9      |
| Family history of suicide            | Yes                   |                 | 17       | 5        |
|                                      | No                    |                 | 321      | 95       |
| <b>Socio-environmental</b>           |                       |                 |          |          |
| Bullying                             | Yes                   |                 | 285      | 84.3     |
|                                      | No                    |                 | 53       | 15.6     |
| <b>Psychological</b>                 | <b>DASS-21 score</b>  | <b>Category</b> | <b>n</b> | <b>%</b> |



|                   |                       |                  |     |      |
|-------------------|-----------------------|------------------|-----|------|
| Stress            | 0-14                  | No stress        | 307 | 90   |
|                   | 15-18                 | Mild             | 24  | 7.1  |
|                   | 19-25                 | Moderate         | 10  | 2.9  |
|                   | 26-33                 | Severe           | 0   | 0    |
|                   | 34+                   | Extremely severe | 0   | 0    |
| Anxiety           | 0-7                   | No anxiety       | 280 | 82.1 |
|                   | 8-9                   | Mild             | 26  | 7.6  |
|                   | 10-14                 | Moderate         | 26  | 7.6  |
|                   | 15-20                 | Severe           | 9   | 2.6  |
|                   | 20+                   | Extremely severe | 0   | 0    |
| Depression        | 0-9                   | No Depression    | 280 | 82.1 |
|                   | 10-13                 | Mild             | 38  | 11.1 |
|                   | 14-20                 | Moderate         | 22  | 6.5  |
|                   | 21-27                 | Severe           | 1   | 0.3  |
|                   | 28+                   | Extremely severe | 0   | 0    |
| Suicidal behavior | Yes (SBQ-R 7 or more) |                  | 42  | 12.3 |
|                   | No (SBQ-R <7)         |                  | 290 | 87.7 |

130

### 131 3.2 Associated factors of suicidal behavior among adolescents

132 Sociodemographic, behavioral, psychological, institutional, family-environmental, and socio-  
 133 environmental factors were used to identify the associated factors of suicidal ideation among  
 134 adolescents. Age, relationship status, having step-parents, peer conflict, grades, teacher  
 135 support, bullying, relationship with parents, the relationship between family members,  
 136 overprotective parents, family history of suicide, stress, anxiety, and depression were found  
 137 statistically significant with a p-value of <0.05 in chi-square test. These variables were  
 138 further analyzed through a multivariate analysis using multiple logistic regression to adjust  
 139 the confounding factors.

140 **Table 2. Factors associated with suicidal behavior among students of 11 to 17 years in**  
 141 **Lohagara (a rural subdistrict in Bangladesh), 2024 (bivariate analysis by chi-squared**  
 142 **test and multivariate analysis by multiple logistic regression).**

| Variables                       | Category             | Suicidal behavior |              | Chi2 p-value | AOR (95% CI)   | p-value after multivariate analysis |
|---------------------------------|----------------------|-------------------|--------------|--------------|----------------|-------------------------------------|
|                                 |                      | Yes               | No           |              |                |                                     |
| <b>Sociodemographic factors</b> |                      |                   |              |              |                |                                     |
| Age                             | 11-13 years          | 6<br>5.2%         | 109<br>94.8% | 0.004        | Reference      | 0.688                               |
|                                 | 13-17 years          | 36<br>15.9%       | 190<br>84.1% |              | 1.3 (0.3-5)    |                                     |
| Relationship status             | Unmarried and single | 28<br>9.1%        | 281<br>90.9% | <0.001       | 0.8 (.01-.7)   | <b>0.023</b>                        |
|                                 | In a relationship    | 9<br>60%          | 6<br>40%     |              | 0.95(.08-11.6) |                                     |
|                                 | Complex              | 2<br>22.2%        | 7<br>77.8%   |              | Reference      |                                     |
|                                 | Married              | 2<br>100%         | 0<br>0%      |              | 1.7(.03-111)   |                                     |
| Step-parents                    | Have                 | 11<br>40.7%       | 16<br>59.3%  | <0.001       | 6.5(1.5-28)    | <b>0.012</b>                        |
|                                 | Do not have          | 31<br>10%         | 280<br>90%   |              | Reference      |                                     |
| <b>Institutional factors</b>    |                      |                   |              |              |                |                                     |
| Peer conflict                   | No                   | 24<br>9.9%        | 218<br>90.1% | <0.001       | 1.9(.5- 6)     | 0.322                               |
|                                 | Moderate             | 13<br>14.8%       | 75<br>85.2%  |              | Reference      |                                     |
|                                 | Severe               | 5<br>62.5%        | 3<br>37.5%   |              | 41 (3.3-       |                                     |

|                                      |                       |             |              |        |                 |              |
|--------------------------------------|-----------------------|-------------|--------------|--------|-----------------|--------------|
|                                      |                       |             |              |        | 520)            |              |
| Grades                               | Satisfactory          | 12<br>5.6%  | 202<br>94.4% | <0.001 | 0.4 (.1-1.1)    | 0.106        |
|                                      | Unsatisfactory        | 30<br>23.8% | 96<br>76.2%  |        | Reference       |              |
| Teacher support                      | Good                  | 35<br>11.2% | 277<br>88.8% | 0.041  | Reference       |              |
|                                      | Moderate              | 5<br>23.8%  | 16<br>76.2%  |        | 0.7 (.1-3.9)    | 0.644        |
|                                      | Poor                  | 2<br>40%    | 3<br>60%     |        | 0.6 (.02-15)    | 0.756        |
| <b>Family-environmental factors</b>  |                       |             |              |        |                 |              |
| Relationship with parents            | Good                  | 23<br>8.8%  | 240<br>91.2% | <0.001 | Reference       |              |
|                                      | Moderate              | 15<br>21.1% | 56<br>78.9%  |        | 0.6(.1-2.6)     | 0.46         |
|                                      | Poor                  | 4<br>66.7%  | 2<br>33.3%   |        | 1.1 (.01-88)    | 0.969        |
| Relationships between family members | Good                  | 21<br>8.2%  | 236<br>91.8% | 0.001  | Reference       |              |
|                                      | Moderate              | 19<br>24%   | 60<br>26%    |        | 1.5 (.4-6)      | 0.56         |
|                                      | Poor                  | 1<br>25%    | 3<br>75%     |        | .04 (.0002-8.8) | 0.239        |
| <b>Overprotective parents</b>        | Yes                   | 25<br>9%    | 254<br>91%   | <0.001 | 0.2 (.1-.7)     | <b>0.014</b> |
|                                      | Moderately protective | 15<br>40%   | 42<br>60%    |        | Reference       |              |
|                                      | No                    | 2<br>26.3%  | 3<br>73.7%   |        | 0.5 (.02-10)    | 0.653        |
| <b>Family history of suicide</b>     | Yes                   | 8<br>47.1%  | 9<br>52.9%   | <0.001 | 7 (1.1-45)      | <b>0.039</b> |
|                                      | No                    | 33<br>10.3% | 288<br>89.7% |        | Reference       |              |
| <b>Socio-environmental factors</b>   |                       |             |              |        |                 |              |
| Bullying                             | Yes                   | 21<br>39.6% | 32<br>60.4%  | <0.001 | 2.8 (.9-10)     | 0.11         |
|                                      | No                    | 21<br>7.4%  | 264<br>92.6% |        | Reference       |              |
| Stress                               | No stress             | 26<br>8.5%  | 281<br>91.5% | <0.001 | Reference       |              |
|                                      | Mild                  | 10<br>41.7% | 14<br>58.3%  |        | 21 (2.9-152)    | <b>0.002</b> |
|                                      | Moderate              | 6<br>60%    | 4<br>40%     |        | 13 (.3-555)     | 0.177        |
| Anxiety                              | No anxiety            | 24<br>8.6%  | 256<br>91.4% | <0.001 | Reference       |              |
|                                      | Mild                  | 3<br>11.5%  | 23<br>88.5%  |        | .02 (.002-.35)  | <b>0.006</b> |
|                                      | Moderate              | 11<br>42.3% | 15<br>57.7%  |        | 1 (.2- 5)       | 0.98         |
|                                      | Severe                | 4           | 5            |        | 0.1 (.005-      | 0.252        |

|            |               |              |              |        |               |       |
|------------|---------------|--------------|--------------|--------|---------------|-------|
|            |               | 44.4%        | 55.6%        |        | 4)            |       |
| Depression | No Depression | 22<br>7.9%   | 258<br>92.1% | <0.001 | Reference     |       |
|            | Mild          | 9<br>23.7%   | 29<br>76.3%  |        | 3 (.7-13)     | 0.132 |
|            | Moderate      | 10<br>45.45% | 12<br>54.55% |        | 9 (1-83)      | 0.51  |
|            | Severe        | 1<br>100%    | 0<br>0%      |        | 0.2 (.001-59) | 0.534 |

143

144 Relationship status, having step-parents, peer conflict, overprotective parents, family history  
 145 of suicide, stress, and anxiety were found to be significantly associated with the development  
 146 of suicidal behavior in preadults. Unmarried and single students were 20% less likely to  
 147 generate suicidal tendencies. However, it was the highest among married adolescents (100%).  
 148 Preadults having step-parents had a 6.5 times greater odds ratio than those who didn't have.  
 149 62.5% of students who were experiencing severe peer conflict had suicidal tendencies which  
 150 is higher than those who had moderate (14.8%) or no (9.9%) disputes with classmates. The  
 151 overconcerned attitude of parents acted as a protective factor for the augmentation of suicidal  
 152 attitudes among young adults. It was comparatively higher (40%) in students whose parents  
 153 were negligent about their academic results than those having overprotective parents (9%).  
 154 Family history of suicide also worked as a concerning factor for the suicidal behaviors of  
 155 adolescents; a 2 times higher odds ratio was detected among those having at least one family  
 156 member committed or attempted suicide. The percentage was commensurate with stress  
 157 levels; 8.5% (26), 41.7% (10), and 60% (6) adolescents had suicidal behavior who were  
 158 encountering normal, mild, and moderate stress respectively. An association of anxiety with  
 159 suicidal behavior was also observed; 44.4% of adolescents suffering from severe anxiety  
 160 revealed suicidal tendencies which is greater than in other classes. **Table 2.**

161

## 162 4. Discussion

163 This study aimed to assess the prevalence and associated factors of developing suicidal  
 164 behavior among adolescents in rural Bangladesh. The point prevalence of suicidal behavior in  
 165 rural adolescents is detected as 12.3% (95% CI: 9.2% to 16.2%). This percentage is attributed  
 166 to several significant factors including having step-parents, relationship status, stress, anxiety,

167 peer conflict, and a family history of suicide. The overprotecting attitude of parents plays a  
168 pivotal role in nullifying the suicidal behaviors of their offspring.

169 The obtained 12.3% prevalence from this study aligns with the global prevalence (14%) of  
170 suicidal ideation among 12 to 17-year-olds (Biswas et al., 2020) and the prevalence in  
171 Brazilian adolescents (14.1%) (Souza et al., 2010). The evaluated result from this research is  
172 also in agreement with the research conducted by Khan et. al unveiling an 11.7% prevalence  
173 of suicidal behavior among 11 to 18-year-old adolescents in Bangladesh (Khan et al., 2020)  
174 and the research carried out by Tasnim et. al during the onset of Covid-19 that highlighted a  
175 12.8% prevalence (Tasnim et al., 2020). However, the result of this study is somewhat distant  
176 from the study conducted by Begum et. al, which revealed 5% of suicidal ideation among 14  
177 to 19-year-olds in rural Bangladesh (Begum et al., 2017), and that is probably due to the  
178 variation in time, methodology, and age groups.

179 A study conducted by Ang et. al depicts that adolescent boys living in single-parent families  
180 are more prone to develop suicidal ideation than their counterparts (Ang & Ooi, 2004). The  
181 current study found the history of having step-parents play a key role in evolving suicidal  
182 behavior in young adults. Married, promised-to-get-married, or those who have received  
183 marriage requests are more prone to generate suicidal thoughts than adolescent girls who  
184 haven't undergone the marriage process (Gage, 2013). This research depicts a significant  
185 association between relationship status and suicidal behavior in young adults.

186 Lack of peer support has a decisive role in preadult suicidal thoughts development (Fotti et  
187 al., 2006; Khan et al., 2020). In a study, Biswas et. al highlighted peer conflict as a  
188 reinforcing factor for the development of suicidal behavior in adolescents (Biswas et al.,  
189 2020), which is in line with this study.

190 Stress(Tasnim et al., 2020) and anxiety(Khan et al., 2020; Tasnim et al., 2020) are important  
191 psychological contributors having a substantial role in growing suicidal thoughts in  
192 adolescents and this study is in agreement with this.

193 Parenting style plays a crucial role in deterring suicidal thoughts in offspring. Some studies  
194 illustrate that the overprotective attitude of parents helps minimize suicidal behaviors in  
195 young adults (Gau et al., 2008; Singh & Behmani, 2018). School-going-children, whose  
196 parents check their homework regularly have less likelihood of generating suicidal ideation  
197 (Cheng et al., 2009; Khan et al., 2020). This study is in line with this finding. On the other  
198 hand, the current study found a similarity with studies that determined the family history of

199 suicide as a key factor in developing suicidal behavior in preadults (Cerel & Roberts, 2005;  
200 Wagner et al., 2003).

201 Some studies found significant associations between loneliness (Pandey et al., 2019),  
202 bullying (Peprah et al., 2023) depression, and gender (Rudatsikira et al., 2007) with the  
203 development of suicidal tendencies in adolescents. This study doesn't find any considerable  
204 association with them, perhaps because of the distinction in age groups, locations, and sample  
205 sizes.

206

## 207 **5. Limitation**

208 This study was conducted with data collected from a specific school in an area because of the  
209 time and resource limitations. Though the school admission policy allows diversity, students  
210 from remote areas of Lohagara aren't inclined to get enrolled here. For this reason, this study  
211 doesn't fully capture the divergence of the community people and thus leaves a chance of  
212 generalizability bias.

213

## 214 **6. Conclusion**

215 However, about 1 in 10 students are developing suicidal behavior at an early age, which is a  
216 matter of concern. Further research with students from different locations in Bangladesh will  
217 help identify other associated or area-specific factors if available. Stakeholders and policy-  
218 makers should come forward to draft plans and policies to scale down the burden. In addition,  
219 ensuring the participation of young adults in health promotional and health educational  
220 programs organized on this issue and increasing their creative opportunities may keep their  
221 mental health well and safeguard them from emerging suicidal tendencies at school age.

222

## 223 **References**

- 224 Ang, R. P., & Ooi, Y. P. (2004). Impact of gender and parents' marital status on adolescents' suicidal  
225 ideation. *International Journal of Social Psychiatry, 50*(4), 351-360.  
226 Begum, A., Rahman, A. F., Rahman, A., Soares, J., Reza Khankeh, H., & Macassa, G. (2017).  
227 Prevalence of suicide ideation among adolescents and young adults in rural Bangladesh.  
228 *International Journal of Mental Health, 46*(3), 177-187.

- 229 Biswas, T., Scott, J. G., Munir, K., Renzaho, A. M., Rawal, L. B., Baxter, J., & Mamun, A. A. (2020).  
230 Global variation in the prevalence of suicidal ideation, anxiety and their correlates among  
231 adolescents: a population based study of 82 countries. *EClinicalMedicine*, 24.  
232 Cerel, J., & Roberts, T. A. (2005). Suicidal behavior in the family and adolescent risk behavior. *Journal*  
233 *of Adolescent Health*, 36(4), 352. e358-352. e314.  
234 Cheng, Y., Tao, M., Riley, L., Kann, L., Ye, L., Tian, X., Tian, B., Hu, J., & Chen, D. (2009). Protective  
235 factors relating to decreased risks of adolescent suicidal behaviour. *Child: care, health and*  
236 *development*, 35(3), 313-322.  
237 Fotti, S. A., Katz, L. Y., Afifi, T. O., & Cox, B. J. (2006). The associations between peer and parental  
238 relationships and suicidal behaviours in early adolescents. *The Canadian Journal of*  
239 *Psychiatry*, 51(11), 698-703.  
240 Gage, A. J. (2013). Association of child marriage with suicidal thoughts and attempts among  
241 adolescent girls in Ethiopia. *Journal of Adolescent Health*, 52(5), 654-656.  
242 Gau, S. S.-F., Chen, Y.-Y., Tsai, F.-J., Lee, M.-B., Chiu, Y.-N., Soong, W.-T., & Hwu, H.-G. (2008). Risk  
243 factors for suicide in Taiwanese college students. *Journal of American College Health*, 57(2),  
244 135-142.  
245 Khan, M. M. A., Rahman, M. M., Islam, M. R., Karim, M., Hasan, M., & Jesmin, S. S. (2020). Suicidal  
246 behavior among school-going adolescents in Bangladesh: findings of the global school-based  
247 student health survey. *Social psychiatry and psychiatric epidemiology*, 55, 1491-1502.  
248 Pandey, A. R., Bista, B., Dhungana, R. R., Aryal, K. K., Chalise, B., & Dhimal, M. (2019). Factors  
249 associated with suicidal ideation and suicidal attempts among adolescent students in Nepal:  
250 Findings from Global School-based Students Health Survey. *PloS one*, 14(4), e0210383.  
251 Peprah, P., Asare, B. Y.-A., Nyadanu, S. D., Asare-Doku, W., Adu, C., Peprah, J., Osafo, J., Kretchy, I. A.,  
252 & Gyasi, R. M. (2023). Bullying victimization and suicidal behavior among adolescents in 28  
253 countries and territories: a moderated mediation model. *Journal of Adolescent Health*, 73(1),  
254 110-117.  
255 Rudatsikira, E., Muula, A. S., Siziya, S., & Twa-Twa, J. (2007). Suicidal ideation and associated factors  
256 among school-going adolescents in rural Uganda. *BMC psychiatry*, 7, 1-6.  
257 Singh, V., & Behmani, R. K. (2018). Parenting style and adolescent suicide ideation: A review.  
258 *Parenting*, 3(2), 1245-1252.  
259 Souza, L. D. d. M., Silva, R. A. d., Jansen, K., Kuhn, R. P., Horta, B. L., & Pinheiro, R. T. (2010). Suicidal  
260 ideation in adolescents aged 11 to 15 years: prevalence and associated factors. *Brazilian*  
261 *Journal of Psychiatry*, 32, 37-41.  
262 Tasnim, R., Islam, M. S., Sujon, M. S. H., Sikder, M. T., & Potenza, M. N. (2020). Suicidal ideation  
263 among Bangladeshi university students early during the COVID-19 pandemic: Prevalence  
264 estimates and correlates. *Children and youth services review*, 119, 105703.  
265 Wagner, B. M., Silverman, M. A. C., & Martin, C. E. (2003). Family factors in youth suicidal behaviors.  
266 *American Behavioral Scientist*, 46(9), 1171-1191.

267
